# Supplementary material
Source: PubMed Central journal article supplement (PMC5457664)
Supplement: NIHMS854983-supplement-supplement_1.pdf [file NIHMS854983-supplement-supplement_1.pdf]

**Supplemental Table 1: Frequency of AFA among investigated ethnic groups**

| <b>Ethnic group</b>           | <b>Total number of patients</b> | <b>Patients with AFA, n (%)</b> |
|-------------------------------|---------------------------------|---------------------------------|
| <b>White</b>                  | 1249                            | 36 (2.9)                        |
| <b>African descent</b>        | 71                              | 5 (7)                           |
| <b>Latino</b>                 | 90                              | 5 (5.6)                         |
| <b>Asian</b>                  | 47                              | 2 (4.3)                         |
| <b>Native North American</b>  | 39                              | 4 (10.3)                        |
| <b>Australian Aboriginal*</b> | 8                               | 0 (0)                           |
| <b>Other</b>                  | 2                               | 0 (0)                           |
